# Supplementary material for: Efficacy of initial dose botulinum toxin A injection in acute concomitant esotropia with different clinical characteristics
Source: PubMed Central journal article supplement — Chin Med J (Engl). 2023 May 26;136(18):2249–50. doi: 10.1097/CM9.0000000000002728 (PMC10508433; doi:10.1097/cm9.0000000000002728), 2023-05-26
Supplement: cm9-136-2249-s001.pdf [file cm9-136-2249-s001.pdf]

**Supplementary Table 1: Baseline characteristics.**

| <b>Baseline characteristics</b>              | <b>Minimum</b> | <b>Maximum</b> | <b><i>M</i> (<i>Q</i><sub>1</sub>, <i>Q</i><sub>3</sub>)</b> | <b>Normality test (<i>P</i>)</b> |
|----------------------------------------------|----------------|----------------|--------------------------------------------------------------|----------------------------------|
| Age (years)                                  | 3              | 25             | 6.00 (4.00, 12.00)                                           | 0                                |
| Length of disease (months)                   | 0.5            | >12            | 3.00 (2.00, 6.00)                                            | 0                                |
| Preoperative angles of deviation (33 cm, PD) | +20            | +85            | +60.00 (40.00, 65.00)                                        | 0.024                            |
| Preoperative angles of deviation (6 m, PD)   | +20            | +80            | +50.00 (35.00, 65.00)                                        | 0.006                            |

**Supplementary Table 2: The angles of deviation, success rate, and incidence of complication after BTA injection during follow-up.**

| Groups                                      | <i>M</i> ( <i>Q</i> <sub>1</sub> , <i>Q</i> <sub>3</sub> ) |                                |                                |                                | Success (%)         | Complication |
|---------------------------------------------|------------------------------------------------------------|--------------------------------|--------------------------------|--------------------------------|---------------------|--------------|
|                                             | 1-month<br>injection                                       | after<br>2-months<br>injection | after<br>3-months<br>injection | after<br>6-months<br>injection |                     |              |
| Grouped by preoperative angles of deviation |                                                            |                                |                                |                                |                     |              |
| <+50 PD                                     | 4.50 (-2.25, 7.50)                                         | 5.00 (0, 8.00)                 | 5.00 (0, 8.00)                 | 3.50 (0, 5.00)                 | 18(90%)             | 9 (45%)      |
| +50 PD~+70 PD                               | 5.00 (0, 6.00)                                             | 5.00 (4.00, 10.00)             | 5.00 (3.00, 30.00)             | 5.00 (0, 26.25)                | 19(70%)             | 12 (44%)     |
| ≥+70 PD                                     | 5.00 (3.75, 30.00)                                         | 16.25 (4.75, 42.50)            | 17.75 (4.75, 52.50)            | 35.00 (5.00, 70.00)            | 4 (40%)             | 1 (10%)      |
| Kruskal–Wallis test ( <i>P</i> )            | 0.213                                                      | 0.094                          | 0.090                          | 0.009                          |                     |              |
| Bonferroni test ( <i>P</i> )*               |                                                            |                                |                                | 0.446; 0.006; 0.115            |                     |              |
| Chi-squared test ( <i>P</i> )*              |                                                            |                                |                                |                                | 0.013               | 0.123        |
|                                             |                                                            |                                |                                |                                | 0.101; 0.007; 0.138 |              |
| Grouped by duration of disease              |                                                            |                                |                                |                                |                     |              |
| <3 months                                   | 5.00 (2.25, 12.25)                                         | 5.00 (0, 15.63)                | 5.00 (0, 35.00)                | 4.50 (0, 32.81)                | 13(72%)             | 8 (44%)      |
| 3~6 months                                  | 5.00 (0, 7.75)                                             | 5.00 (0.75, 9.50)              | 5.00 (3.25, 15.00)             | 5.00 (1.25, 14.38)             | 17(70%)             | 8 (33%)      |
| ≥6 months                                   | 5.00 (2.00, 6.00)                                          | 5.00 (5.00, 22.00)             | 5.00 (5.00, 22.00)             | 5.00 (0, 30.00)                | 10(66%)             | 6 (40%)      |

---

|                                  |       |       |       |       |       |       |
|----------------------------------|-------|-------|-------|-------|-------|-------|
| Kruskal–Wallis test ( <i>P</i> ) | 0.779 | 0.470 | 0.757 | 0.862 |       |       |
| Chi-squared test ( <i>P</i> )    |       |       |       |       | 0.937 | 0.759 |

---

Data are shown as  $M(Q_1, Q_3)$  or  $n$  (%).

\*If there was statistical difference among three groups, further comparisons between two groups will be made in turn.

PD: prism diopters.
